# Supplementary figures and images for: CFSP: a collaborative frequent sequence pattern discovery algorithm for nucleic acid sequence classification
Source: PeerJ journal article supplement (doi:10.7717/peerj.8965), 2020-04-20

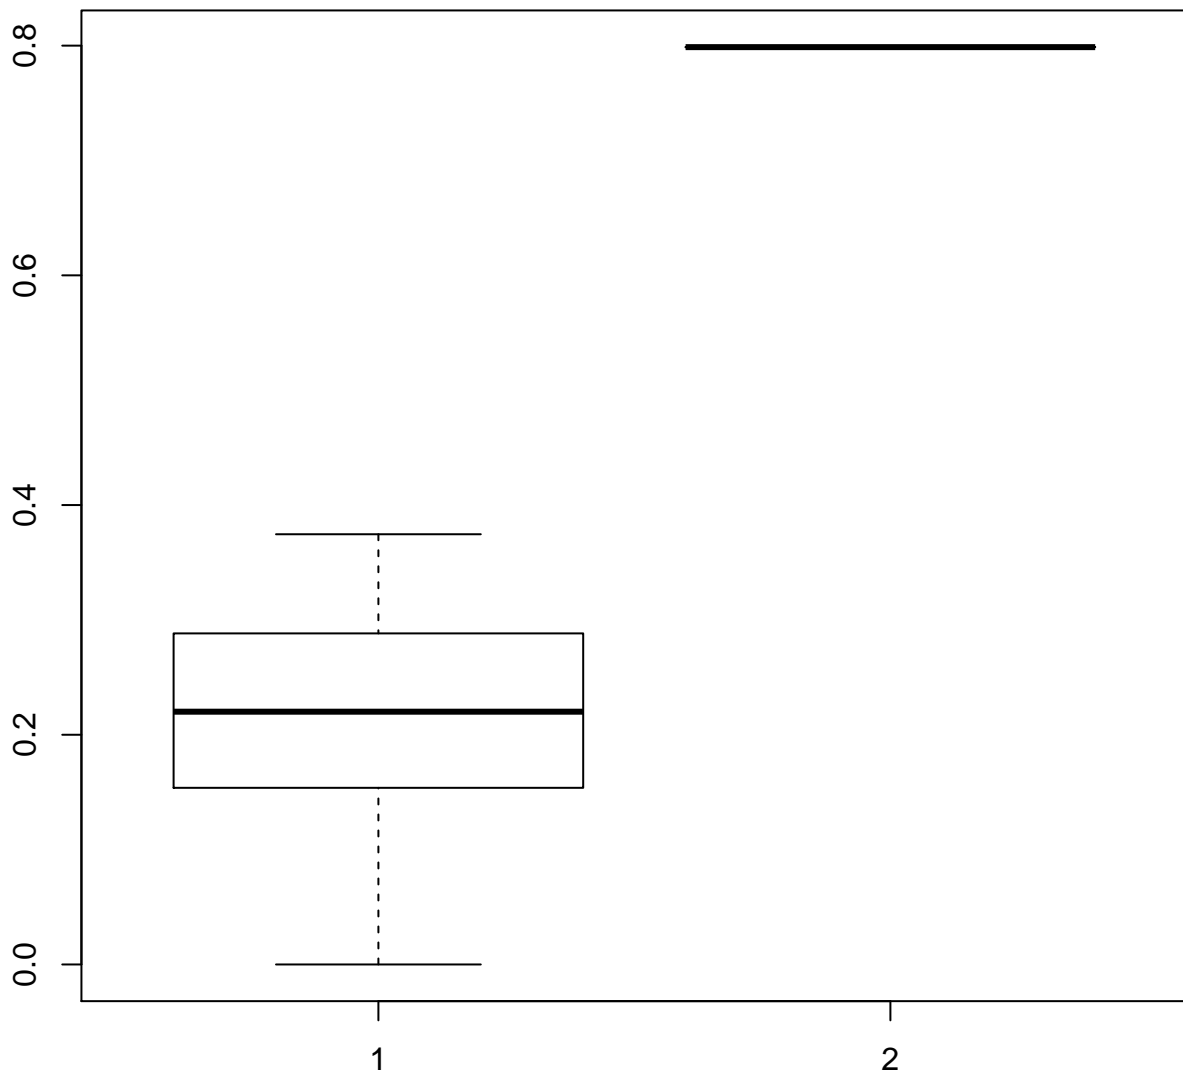

Supplement: SupplementaryMaterialB.zip [file SupplementaryMaterialB.zip]

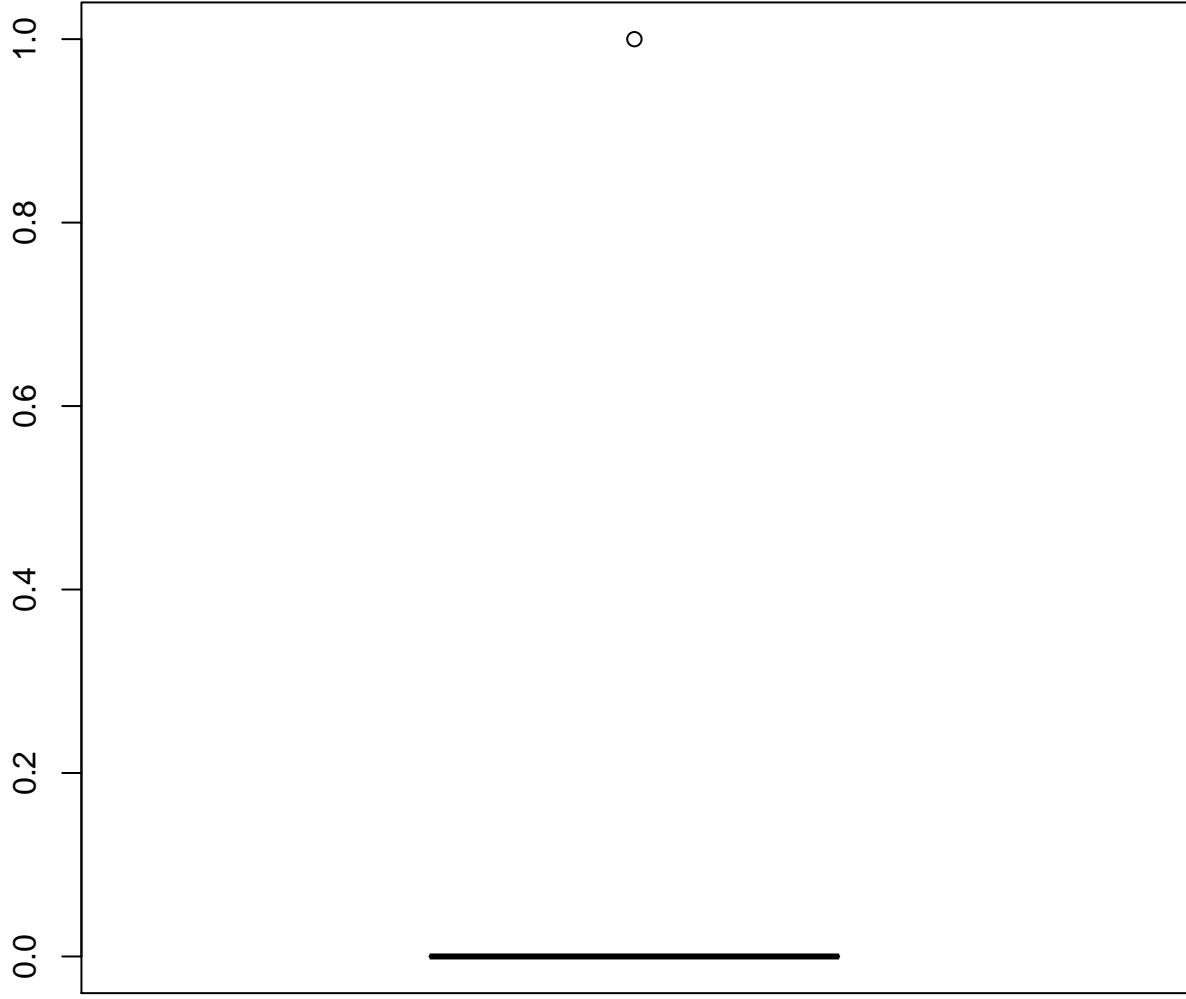

Supplement: SupplementaryMaterialB.zip [file SupplementaryMaterialB.zip]

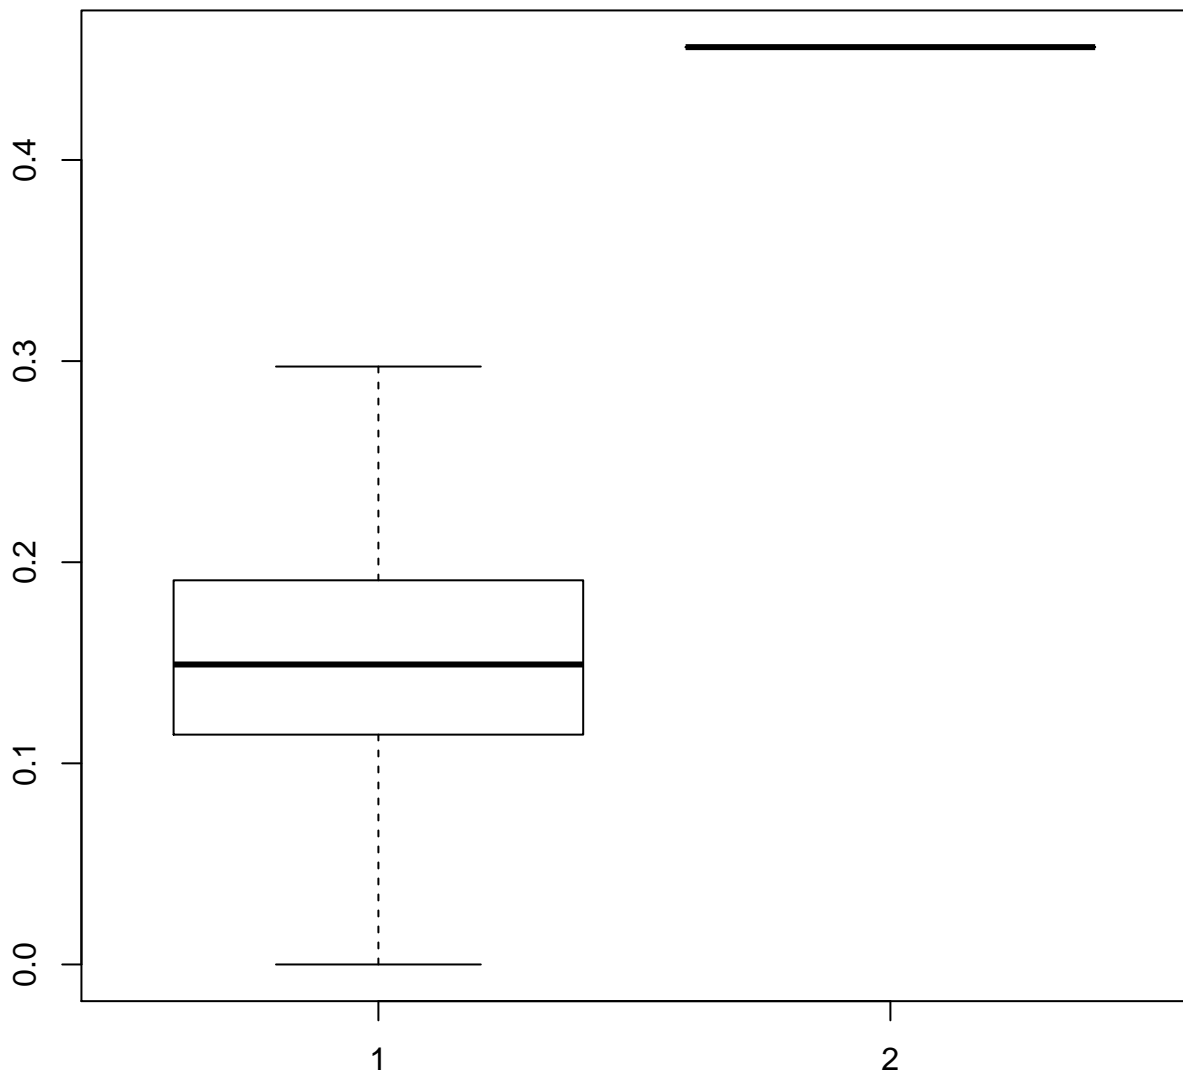

Supplement: SupplementaryMaterialB.zip [file SupplementaryMaterialB.zip]

QQ-plot for all 998,805 p-values

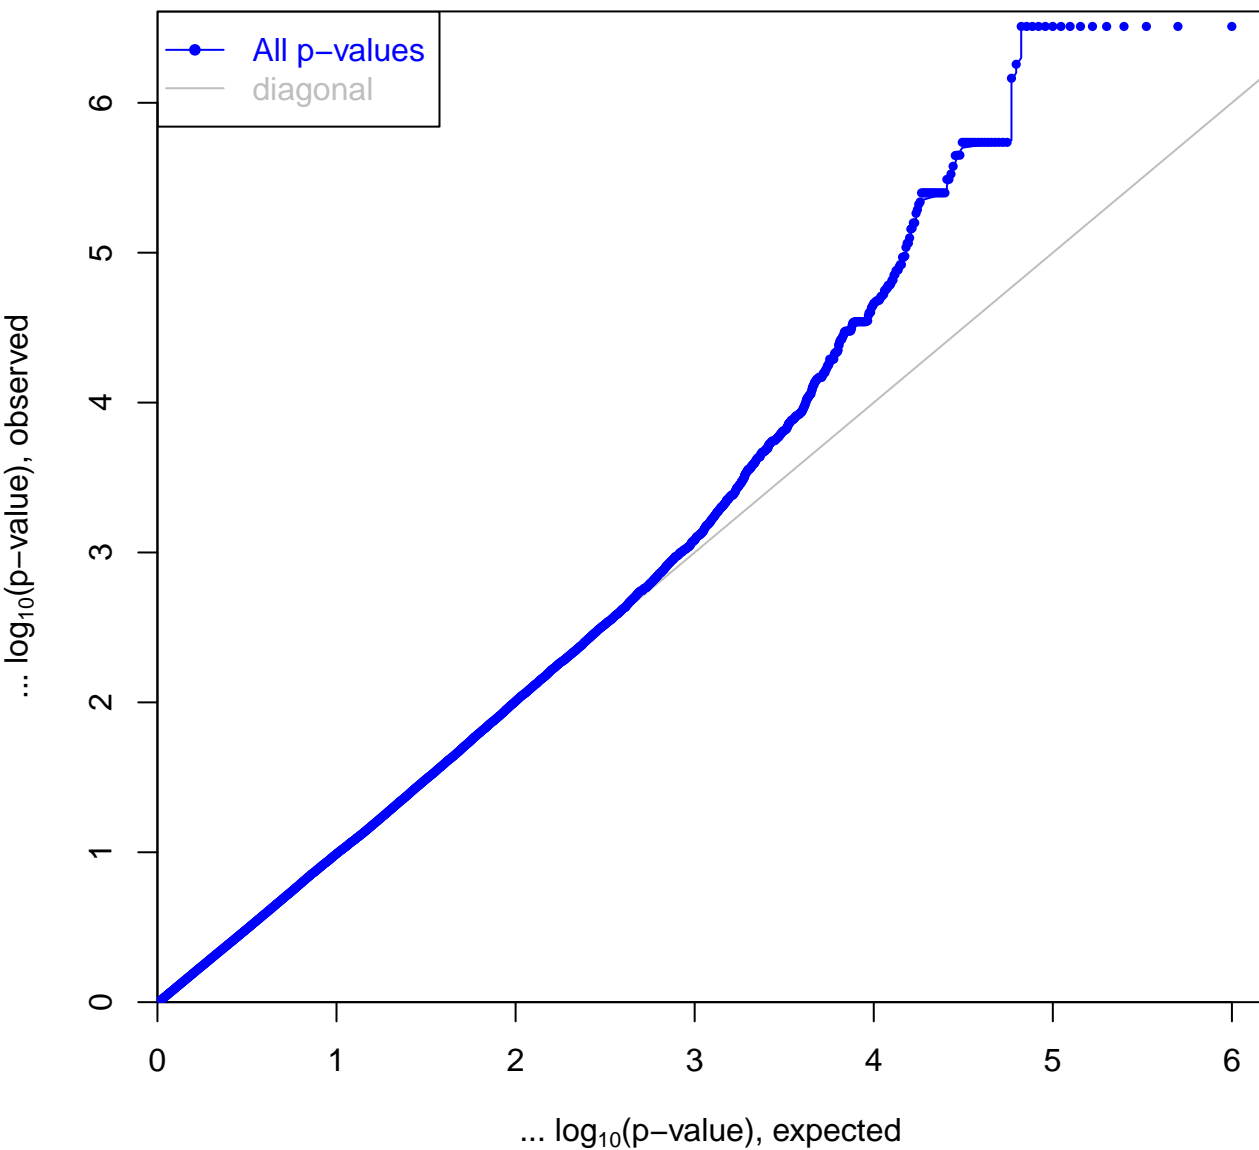

Supplement: SupplementaryMaterialB.zip [file SupplementaryMaterialB.zip]

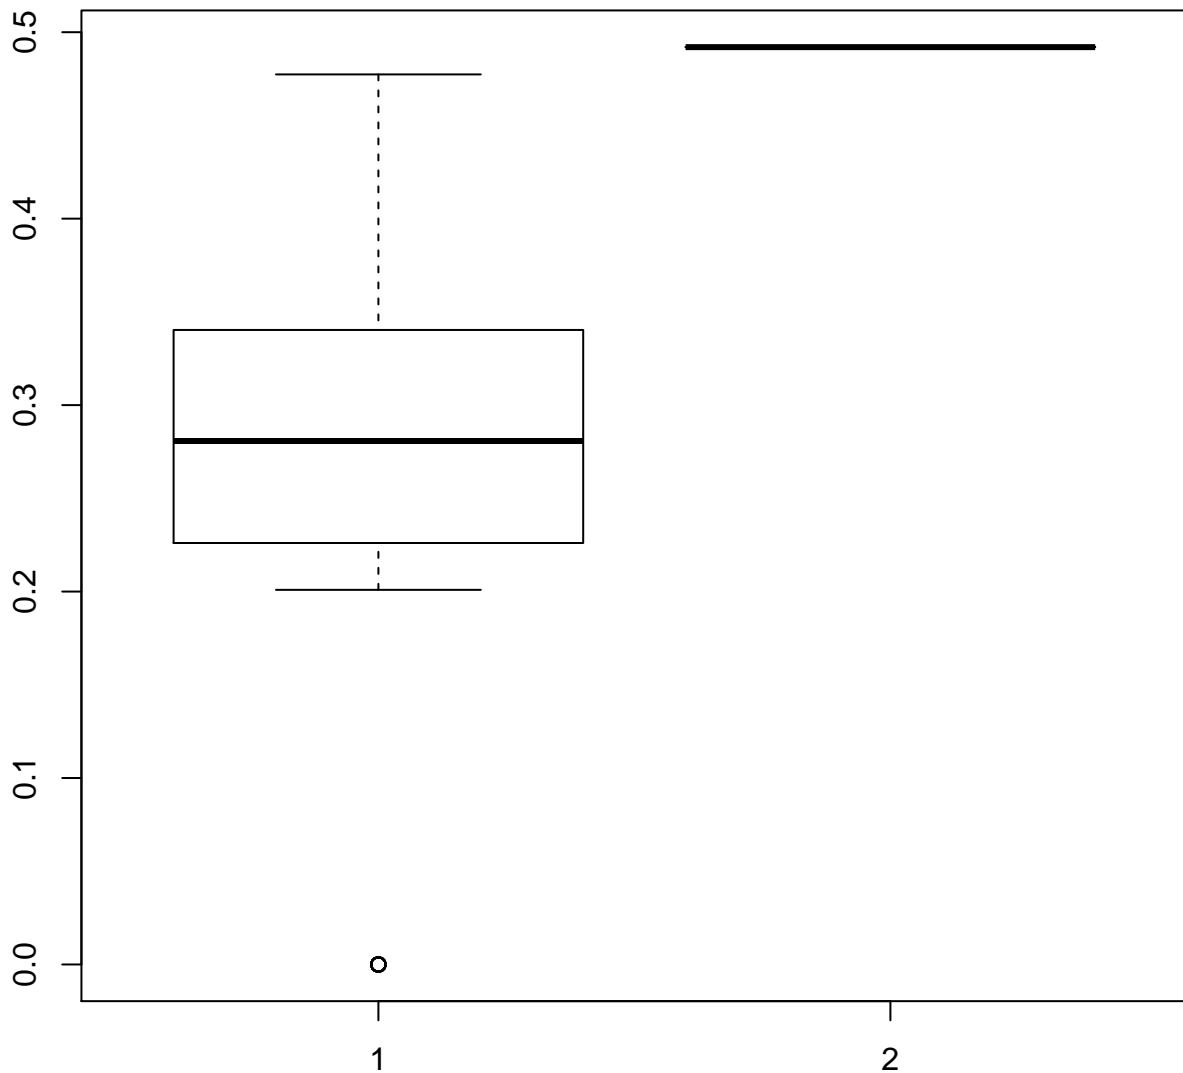

Supplement: SupplementaryMaterialB.zip [file SupplementaryMaterialB.zip]

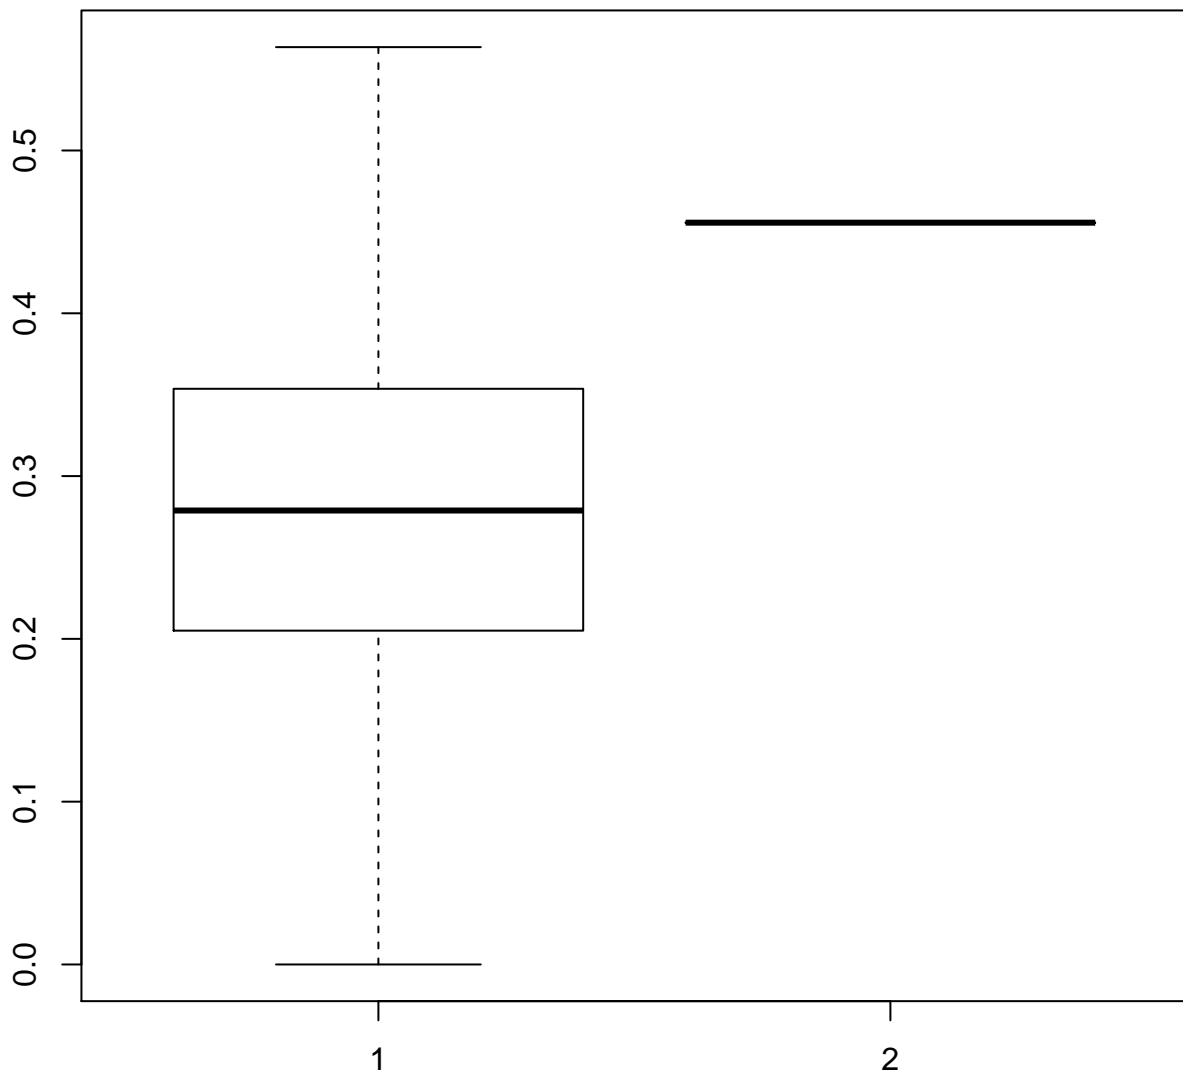

Supplement: SupplementaryMaterialB.zip [file SupplementaryMaterialB.zip]

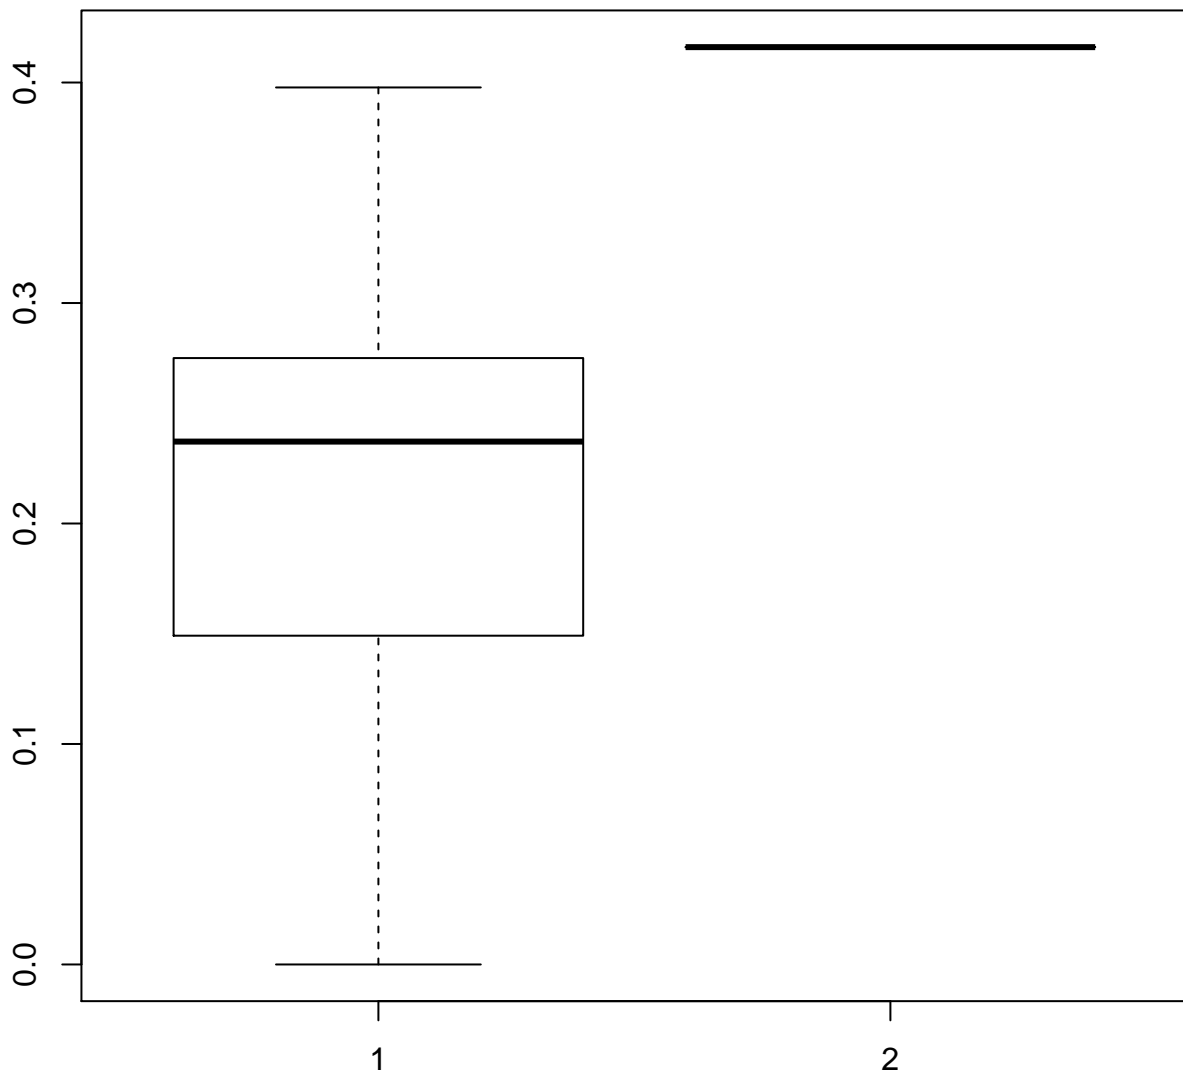

Supplement: SupplementaryMaterialB.zip [file SupplementaryMaterialB.zip]

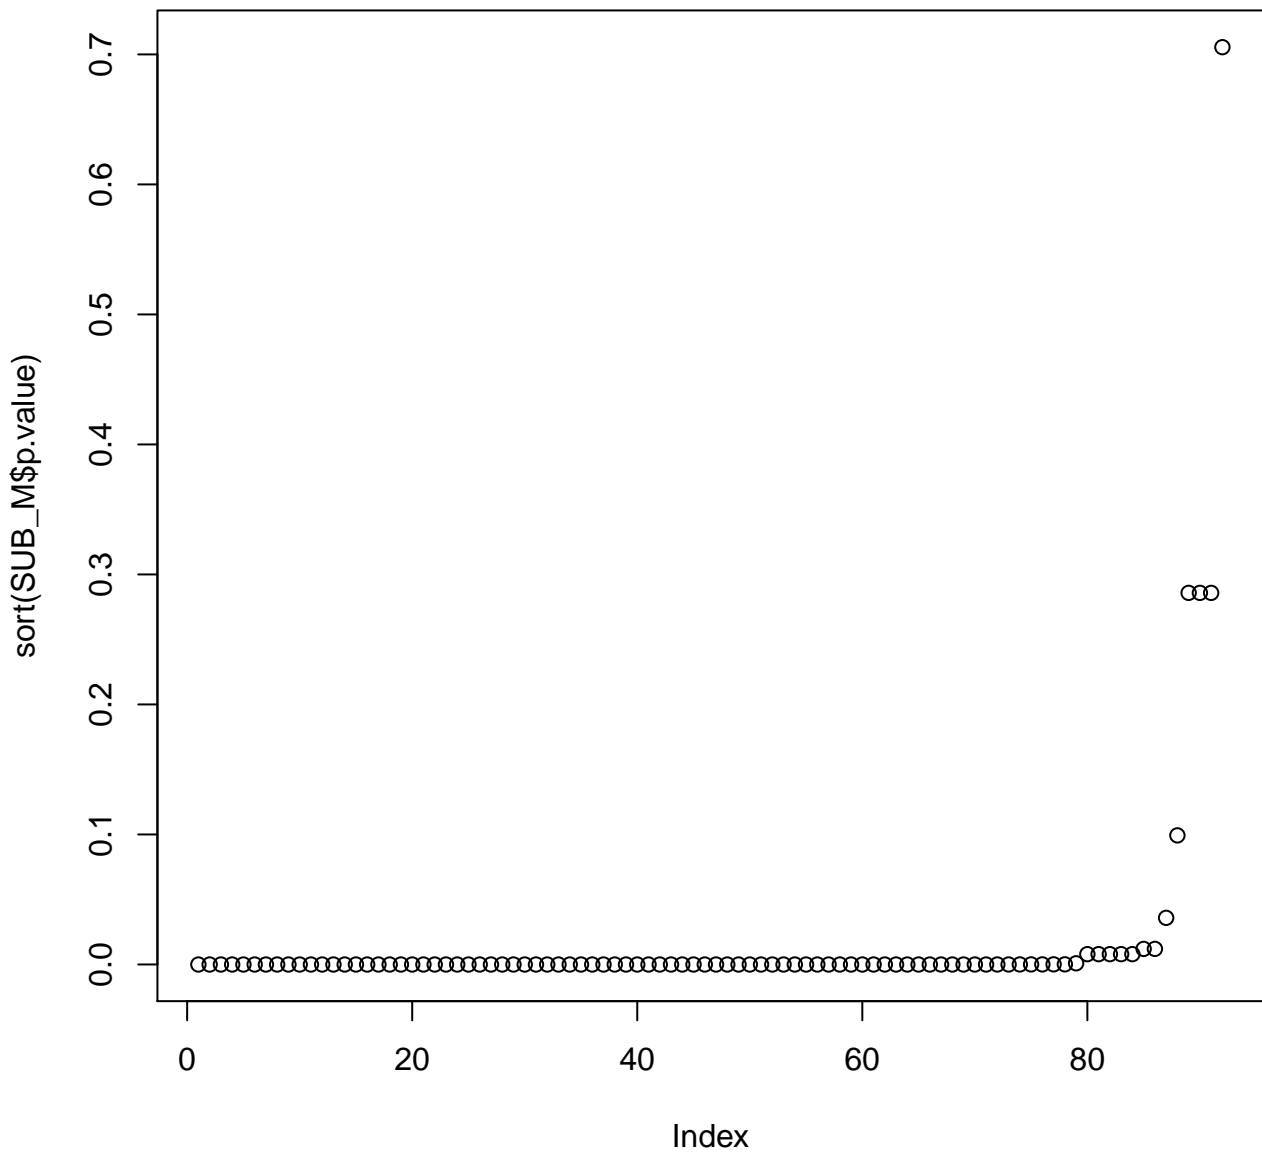

Supplement: SupplementaryMaterialB.zip [file SupplementaryMaterialB.zip]

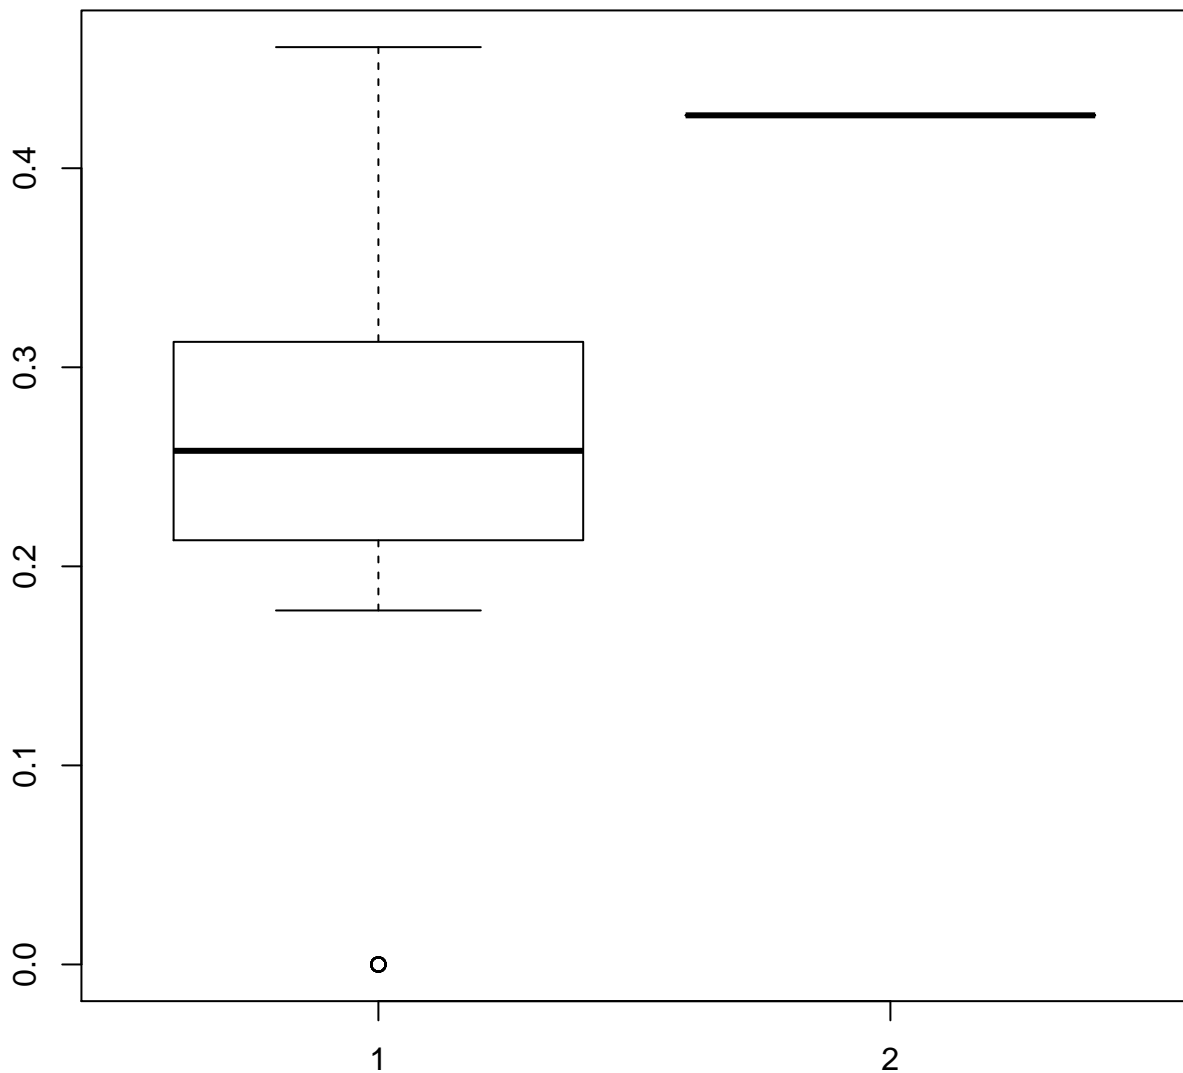

Supplement: SupplementaryMaterialB.zip [file SupplementaryMaterialB.zip]

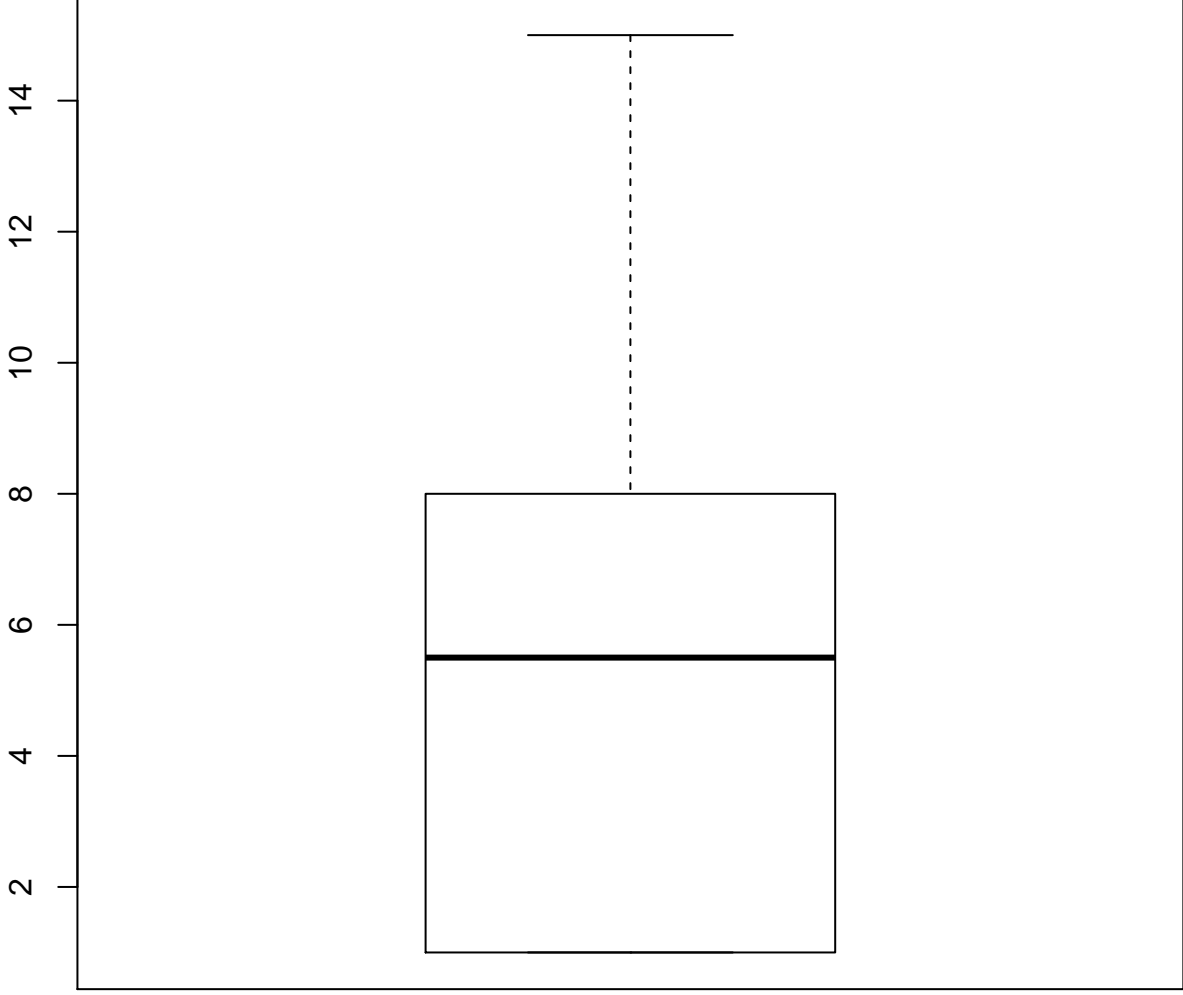

Supplement: SupplementaryMaterialB.zip [file SupplementaryMaterialB.zip]

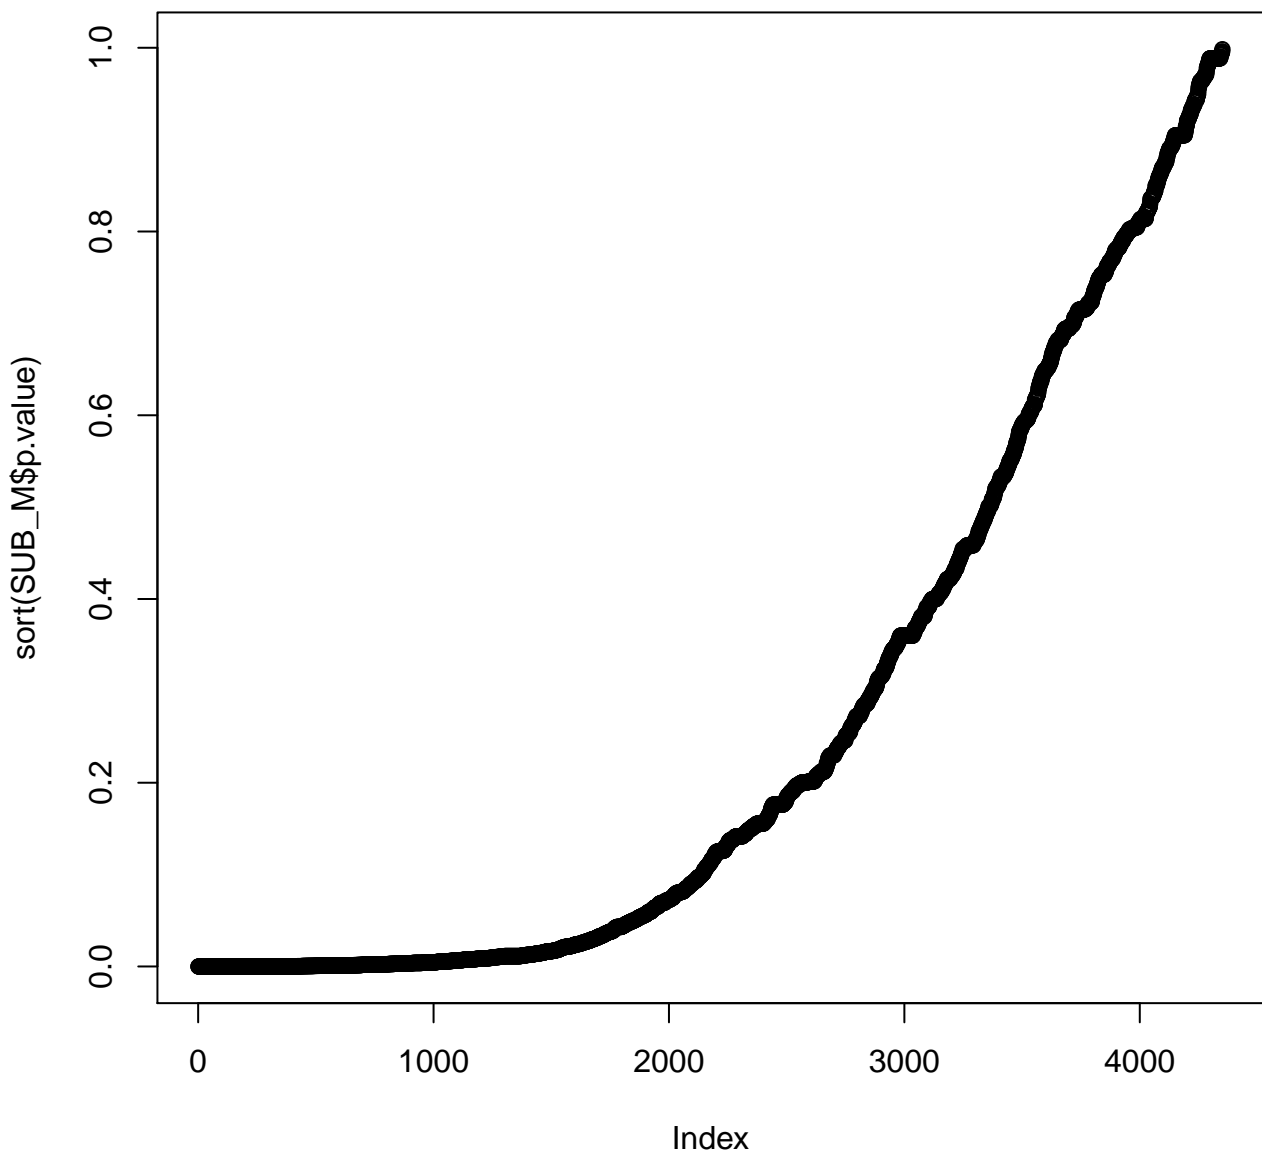

Supplement: SupplementaryMaterialB.zip [file SupplementaryMaterialB.zip]

QQ-plot for all 1,065,392 p-values

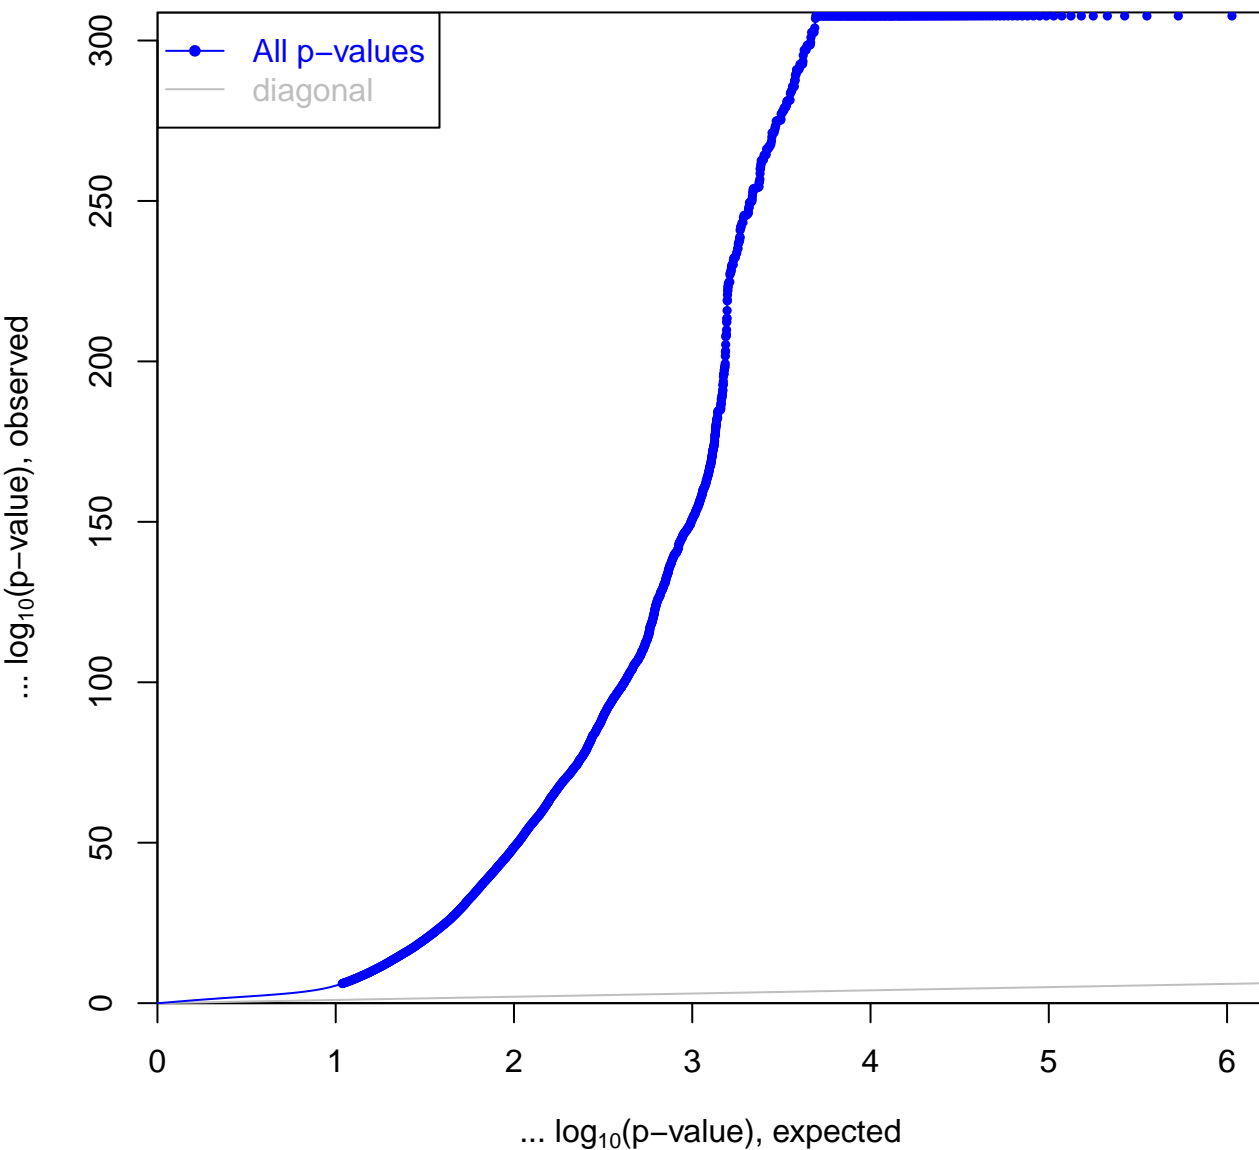

Supplement: SupplementaryMaterialB.zip [file SupplementaryMaterialB.zip]

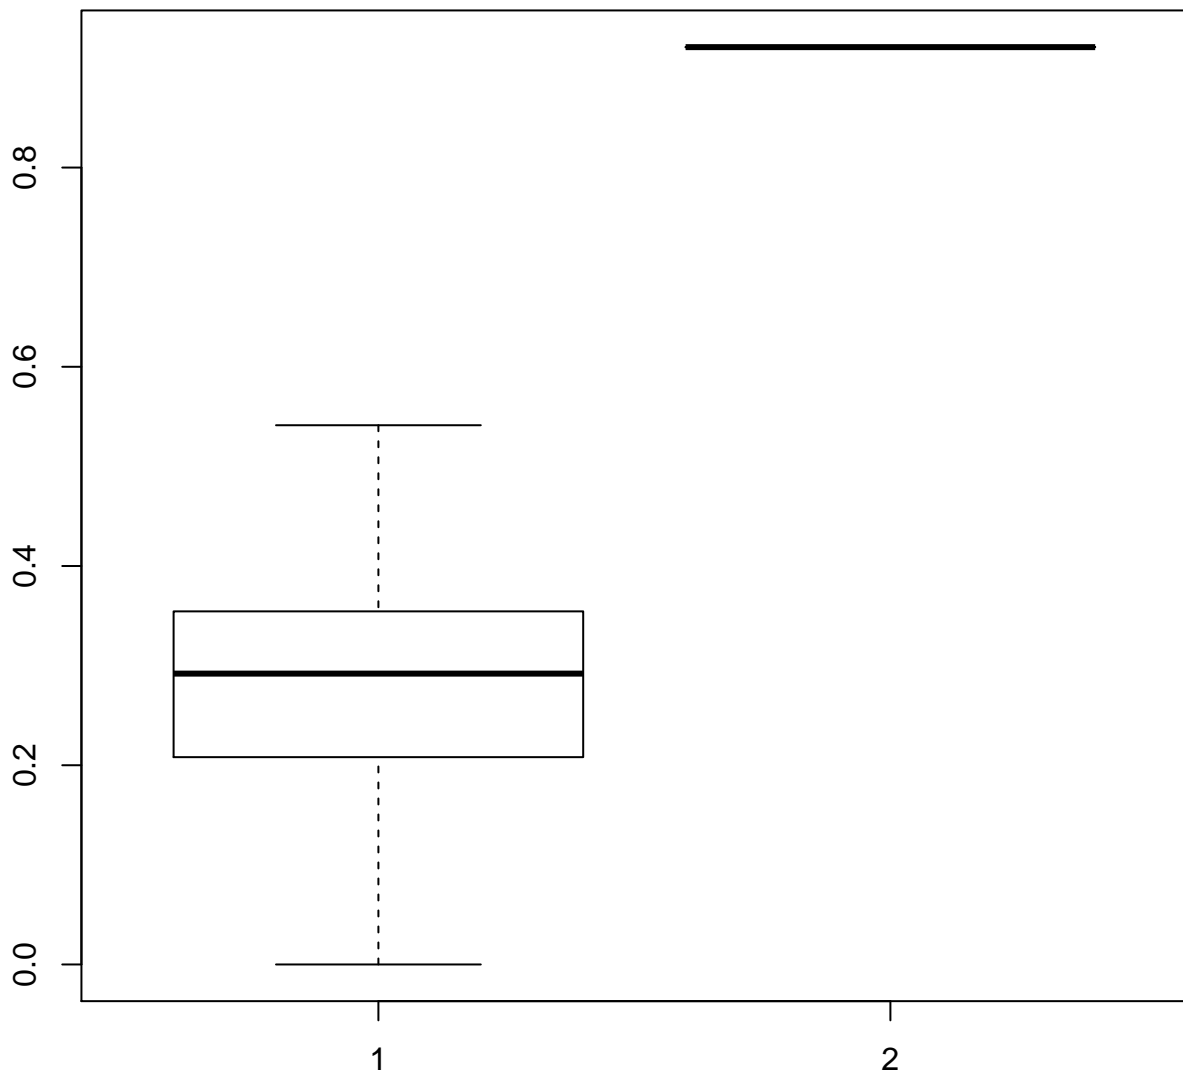

Supplement: SupplementaryMaterialB.zip [file SupplementaryMaterialB.zip]

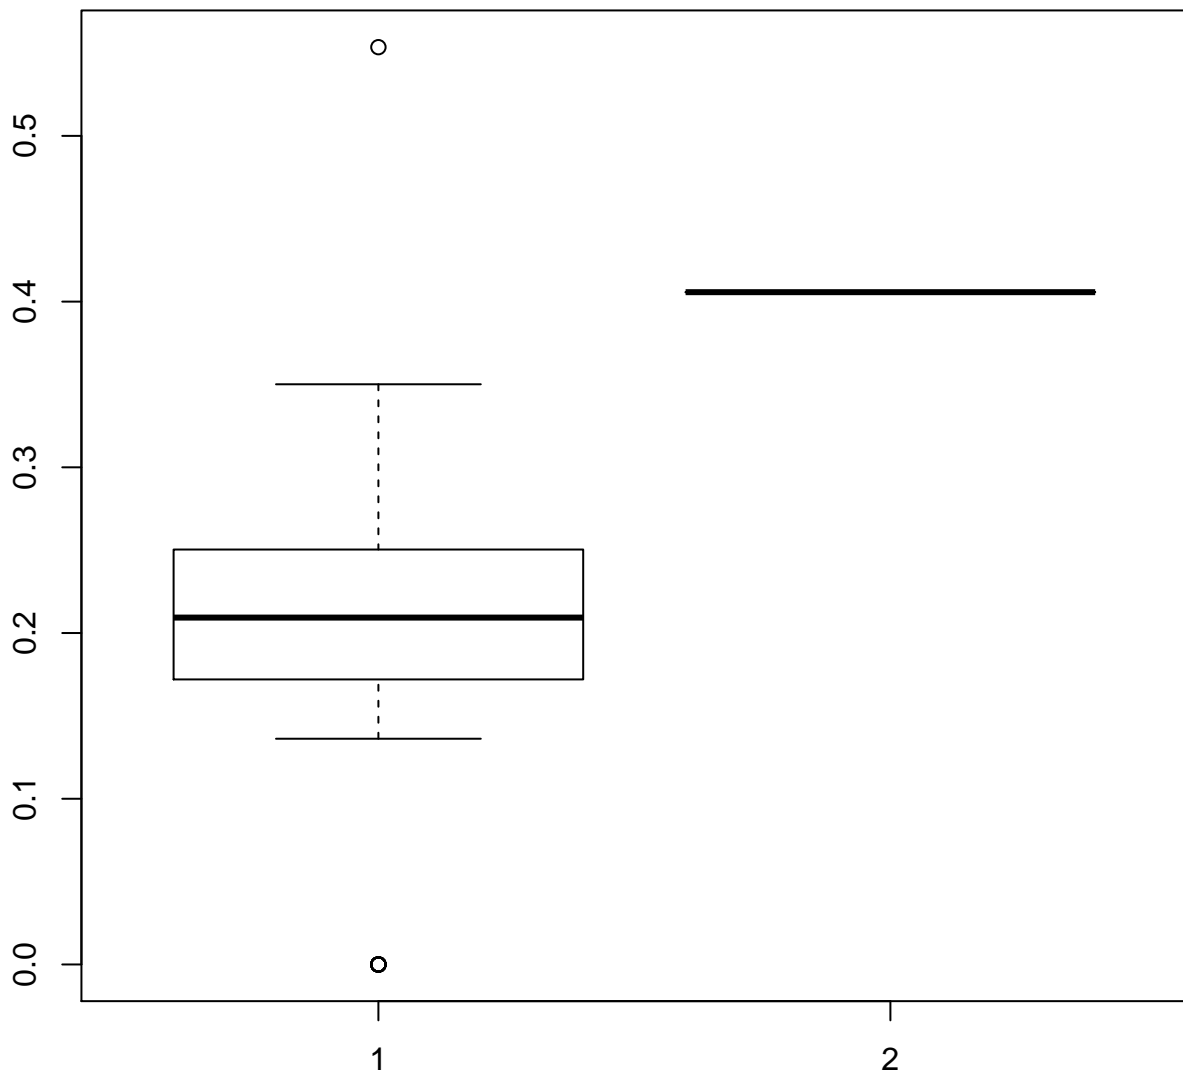

Supplement: SupplementaryMaterialB.zip [file SupplementaryMaterialB.zip]

Histogram of X

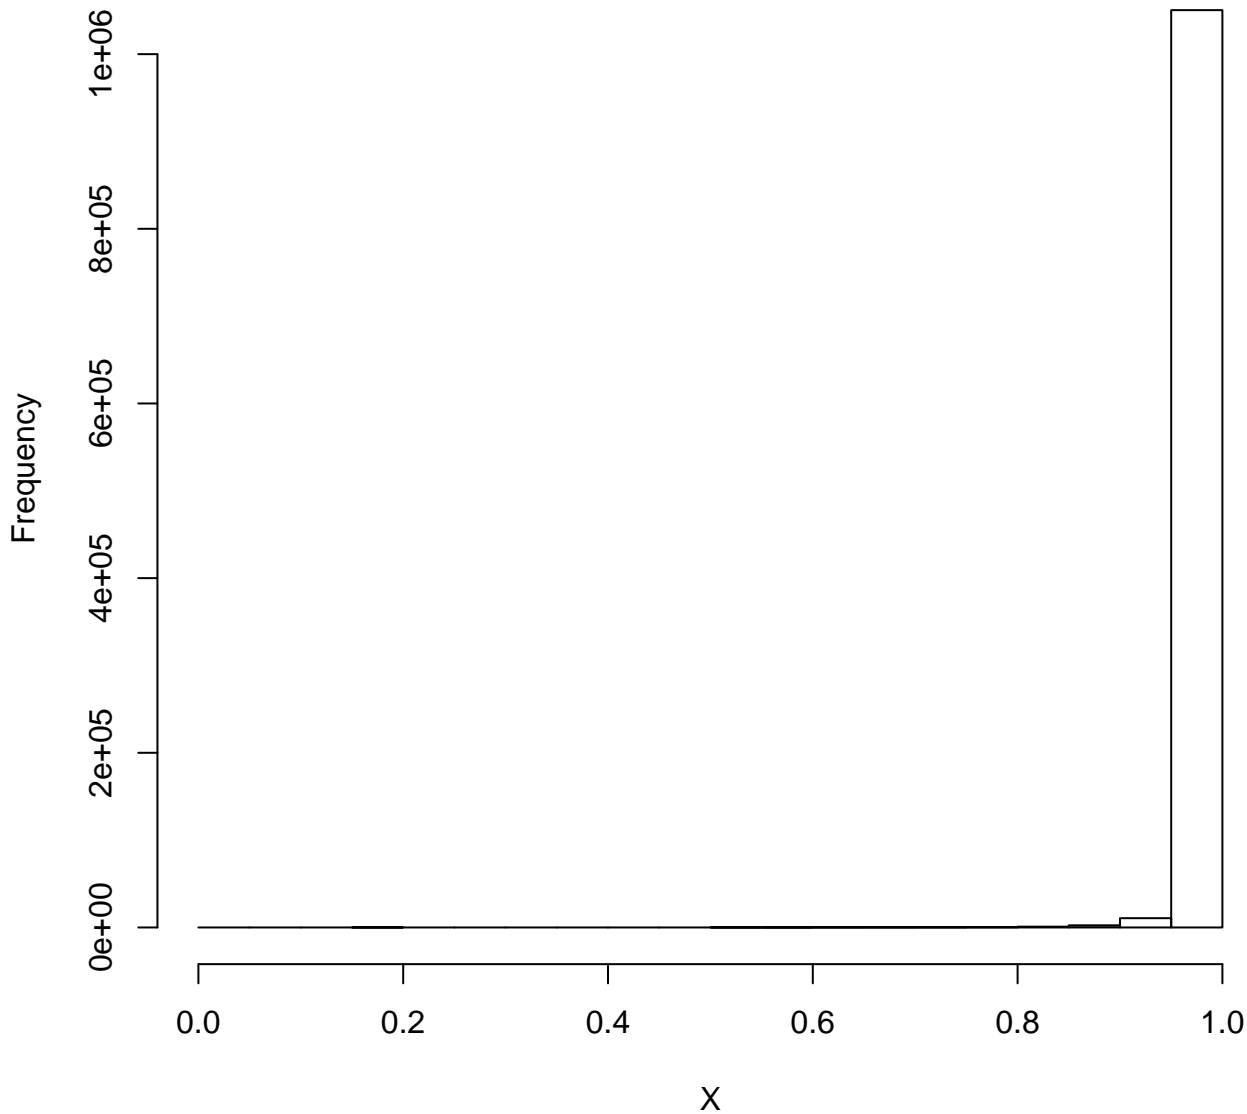

Supplement: SupplementaryMaterialB.zip [file SupplementaryMaterialB.zip]

Histogram of  $M_{[, 2]}$

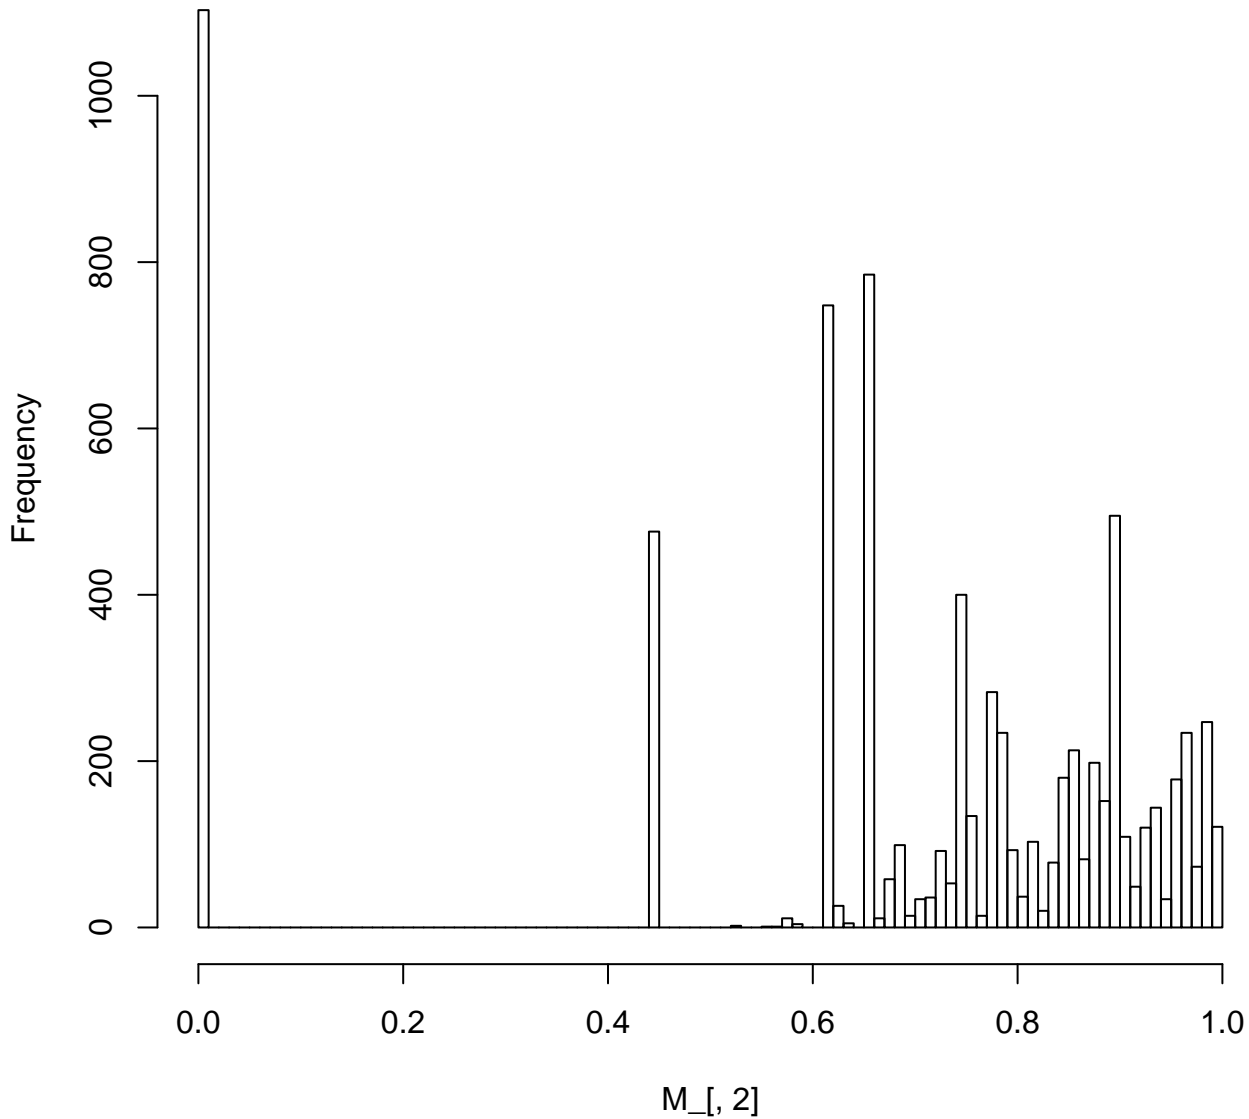

Supplement: SupplementaryMaterialB.zip [file SupplementaryMaterialB.zip]

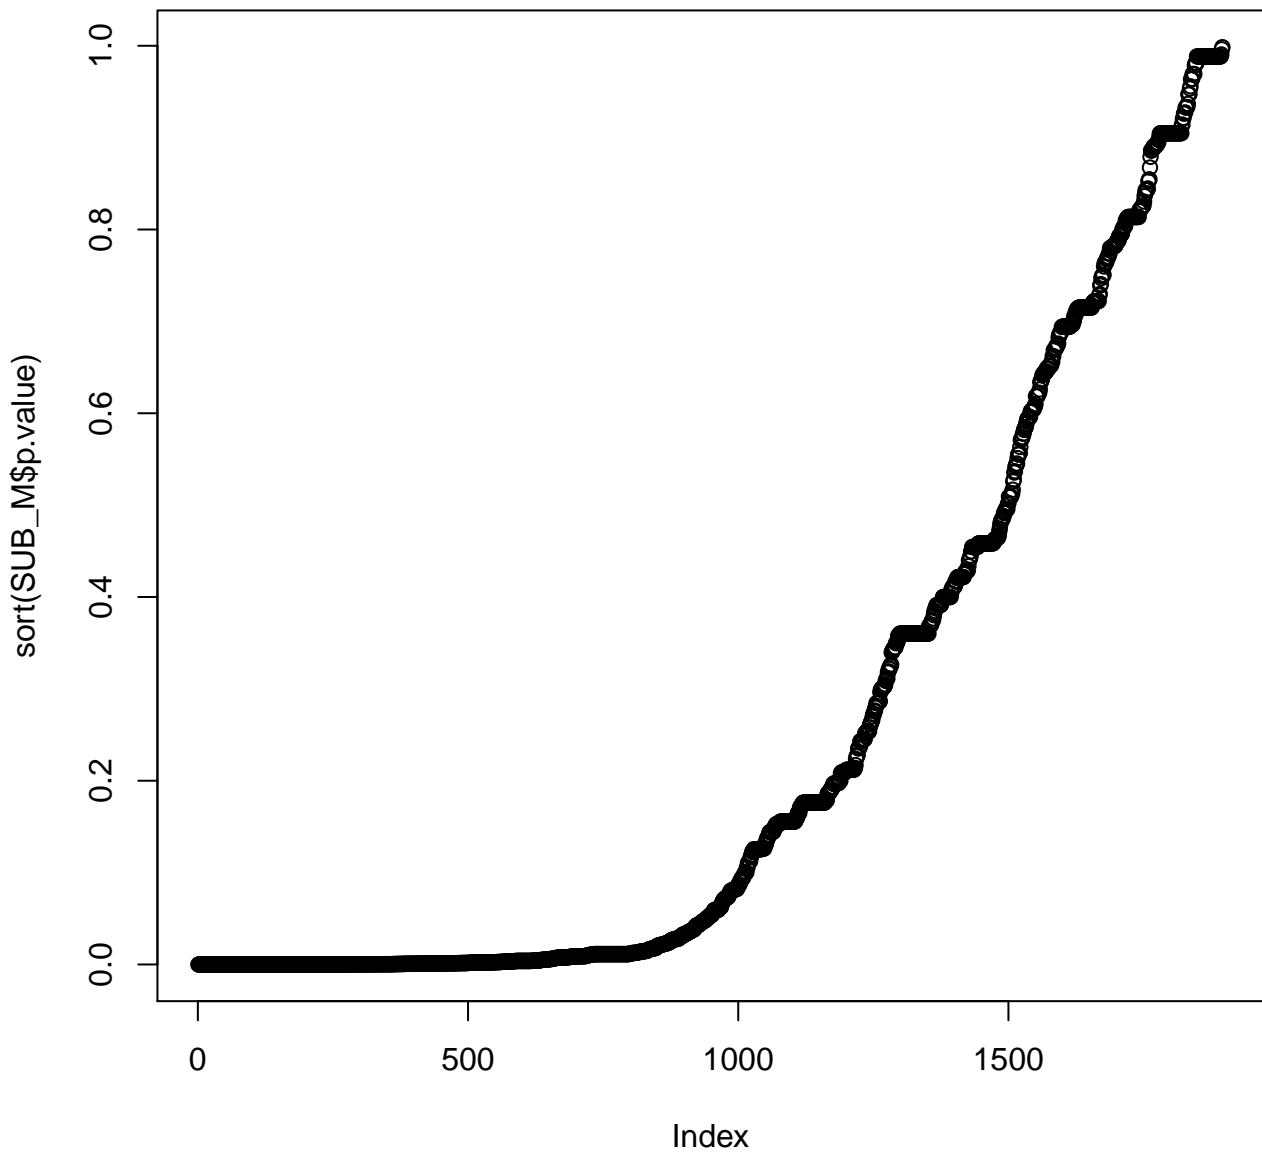

Supplement: SupplementaryMaterialB.zip [file SupplementaryMaterialB.zip]

Histogram of X

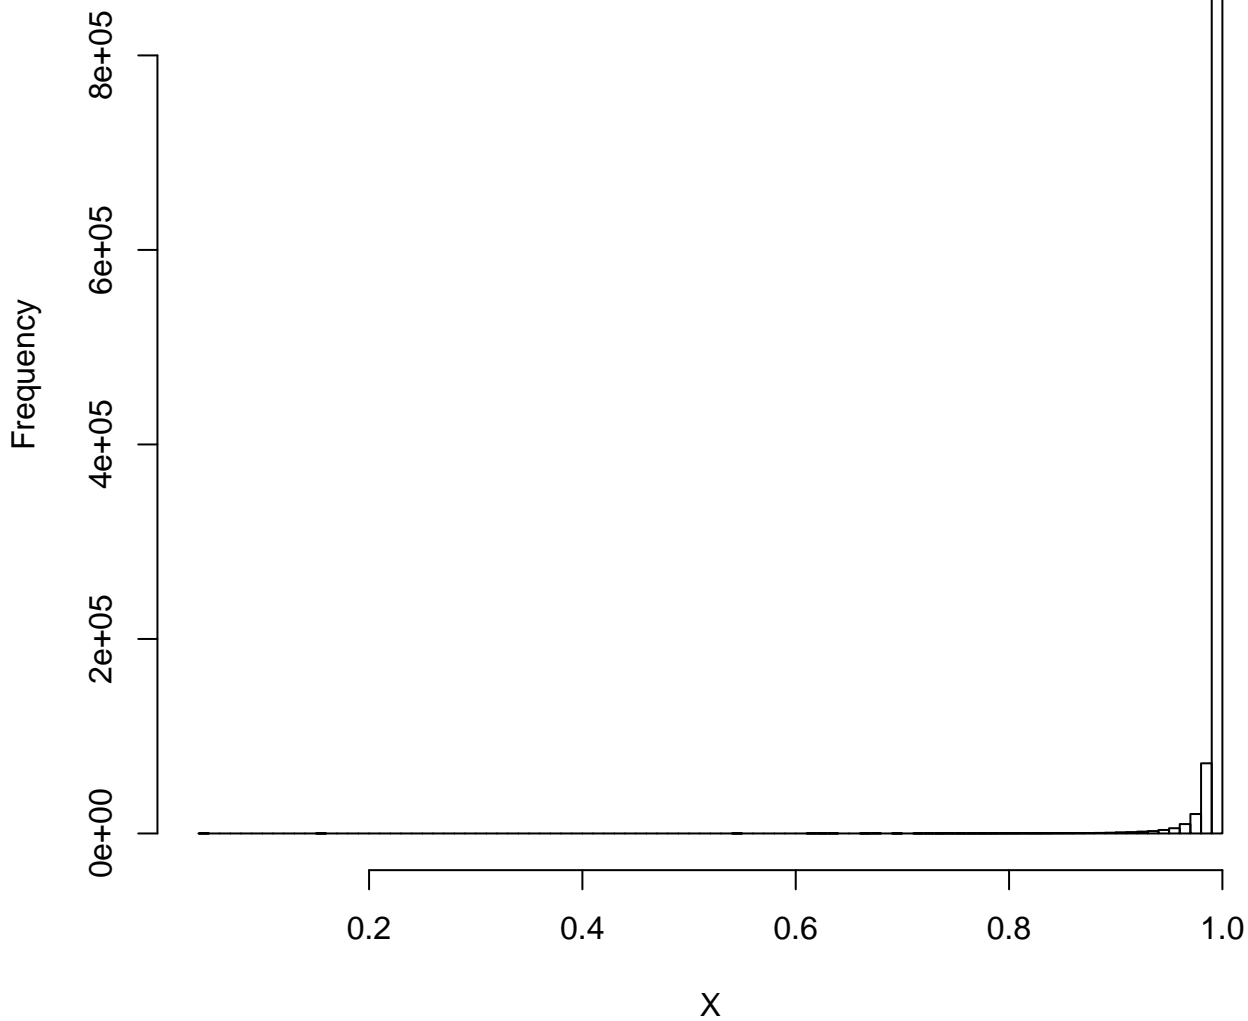

Supplement: SupplementaryMaterialB.zip [file SupplementaryMaterialB.zip]

QQ-plot for all 1,065,392 p-values

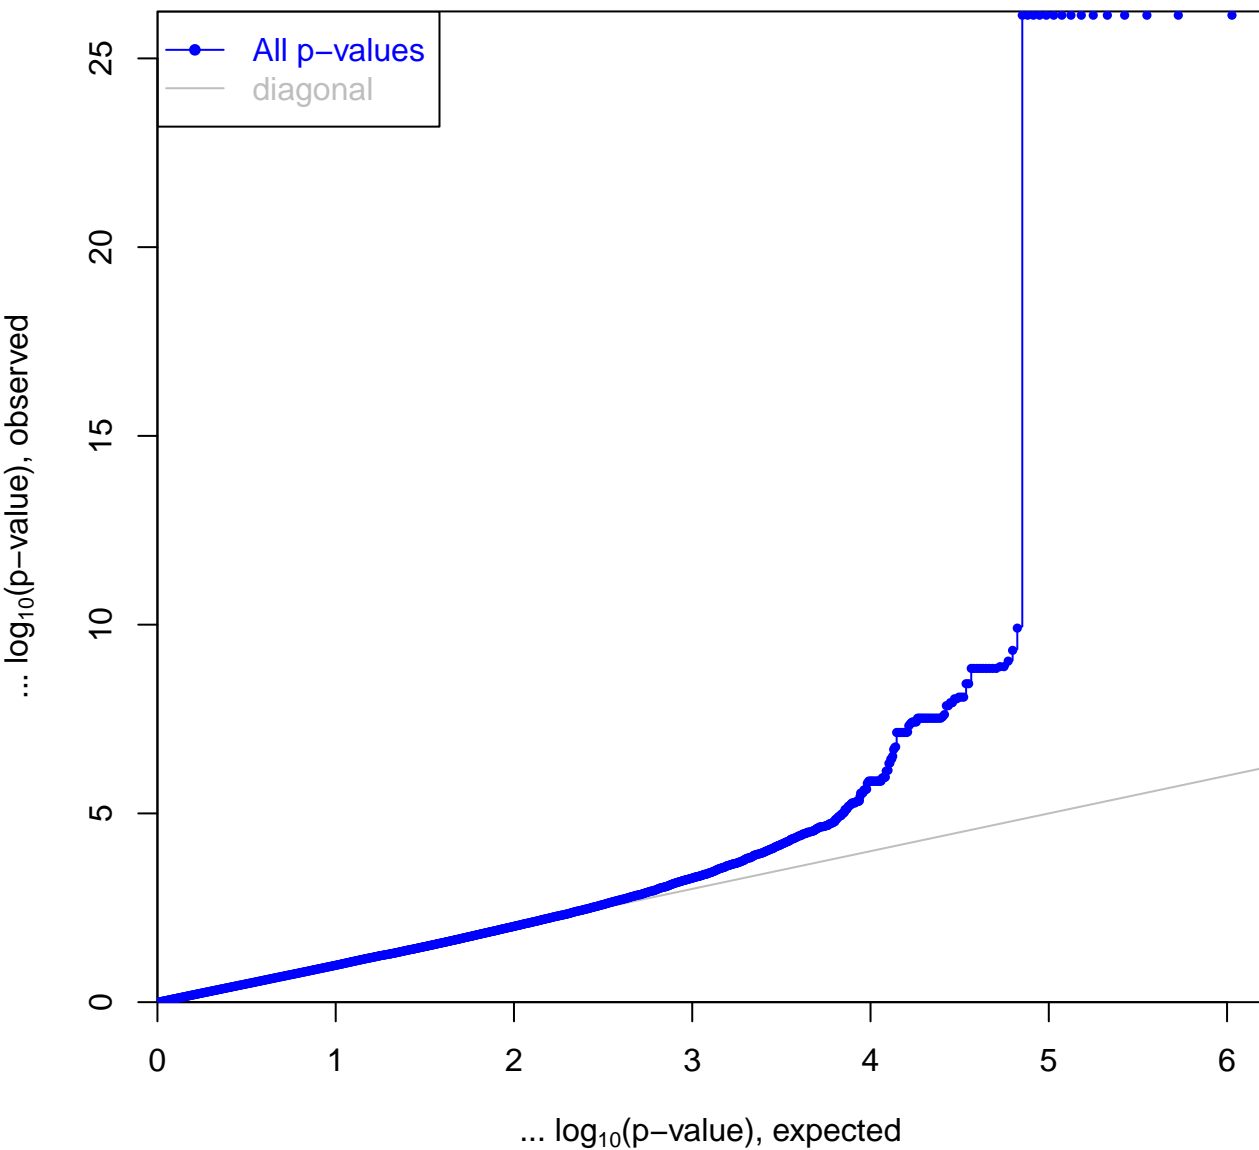

Supplement: SupplementaryMaterialB.zip [file SupplementaryMaterialB.zip]

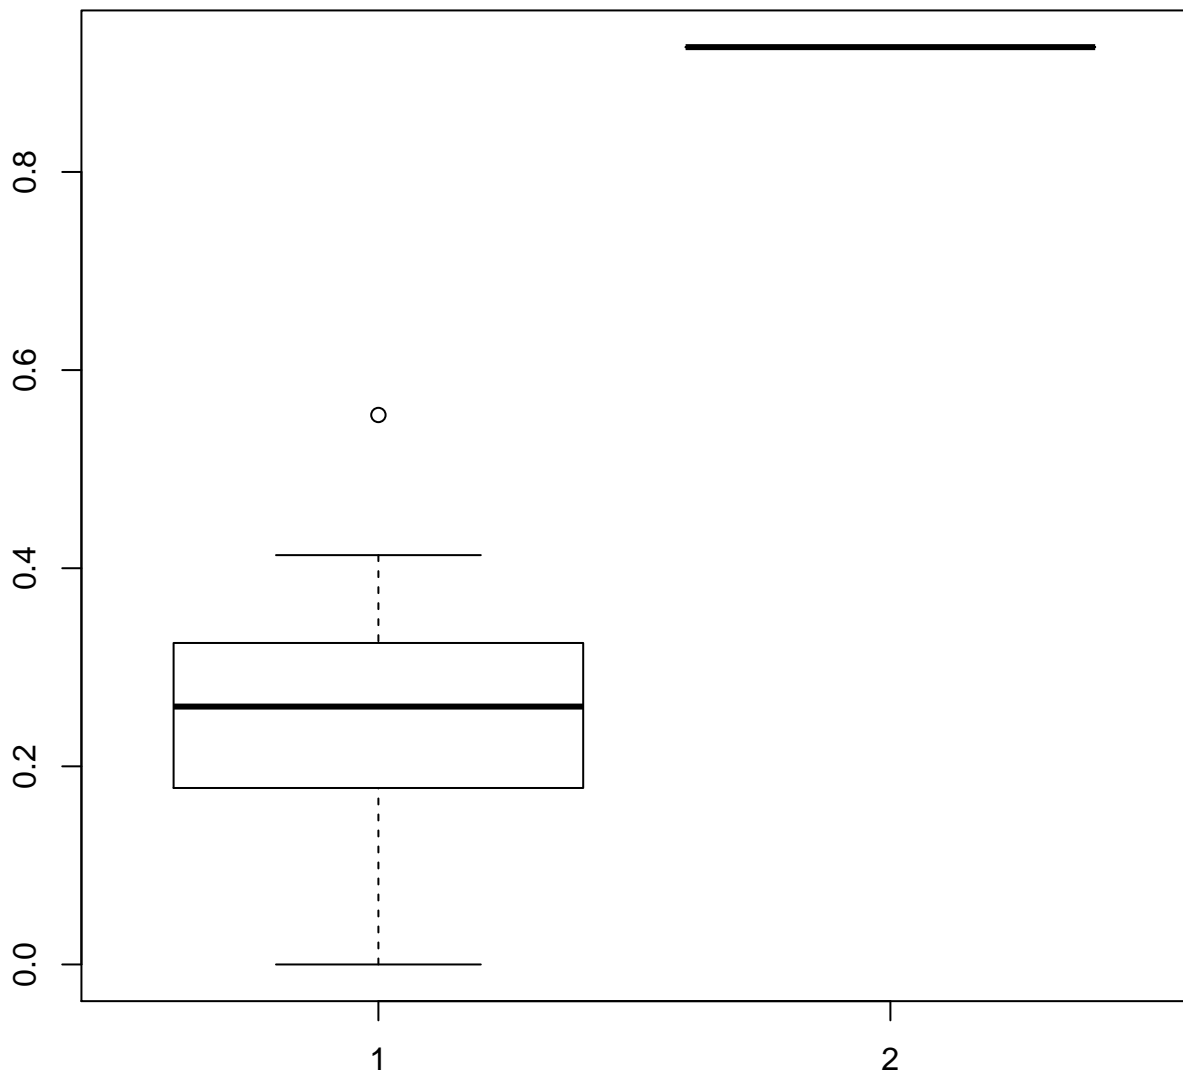

Supplement: SupplementaryMaterialB.zip [file SupplementaryMaterialB.zip]

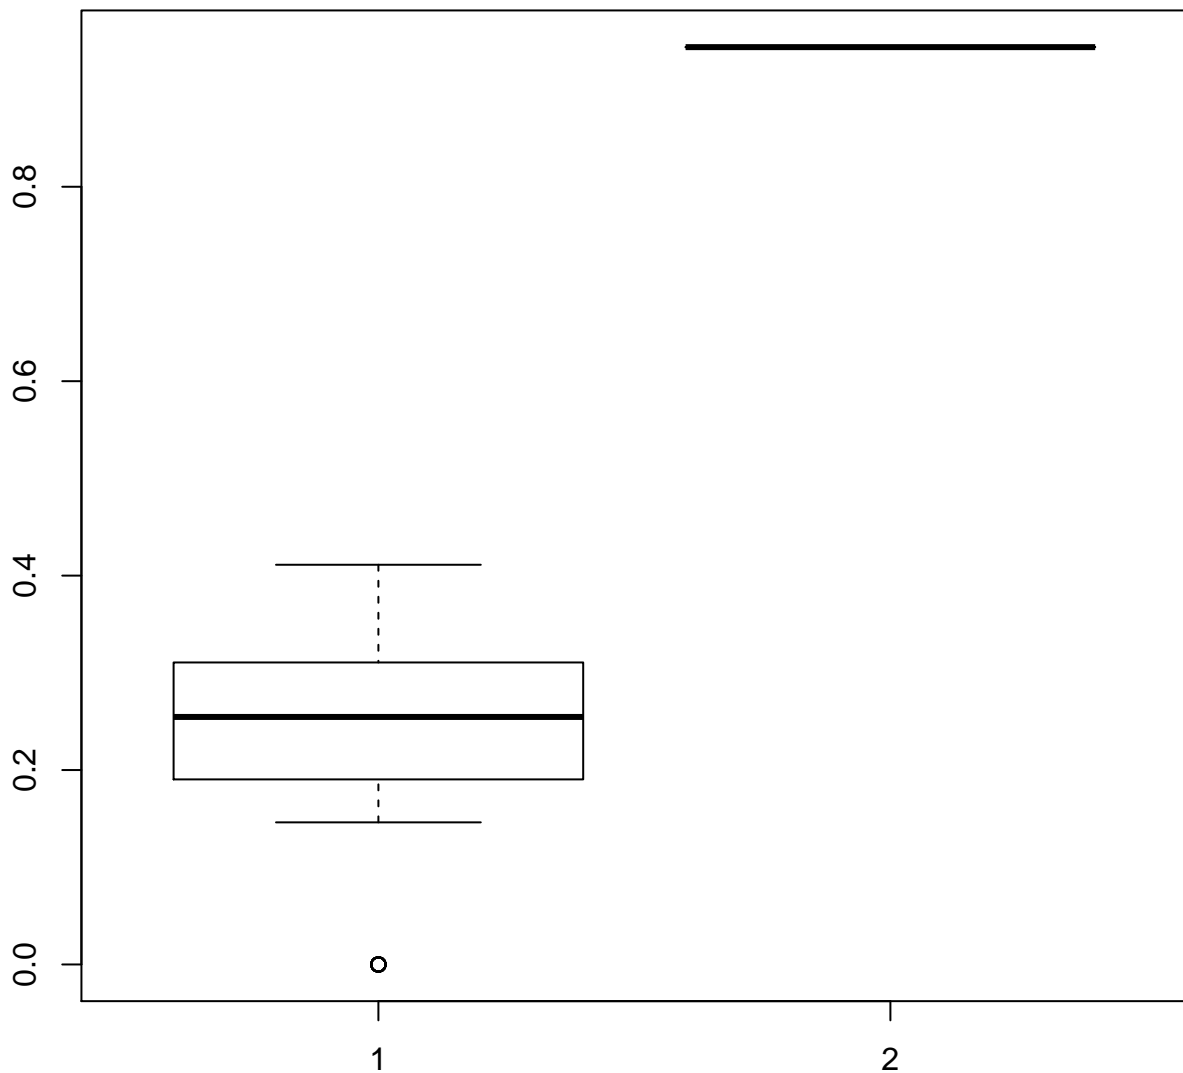

Supplement: SupplementaryMaterialB.zip [file SupplementaryMaterialB.zip]

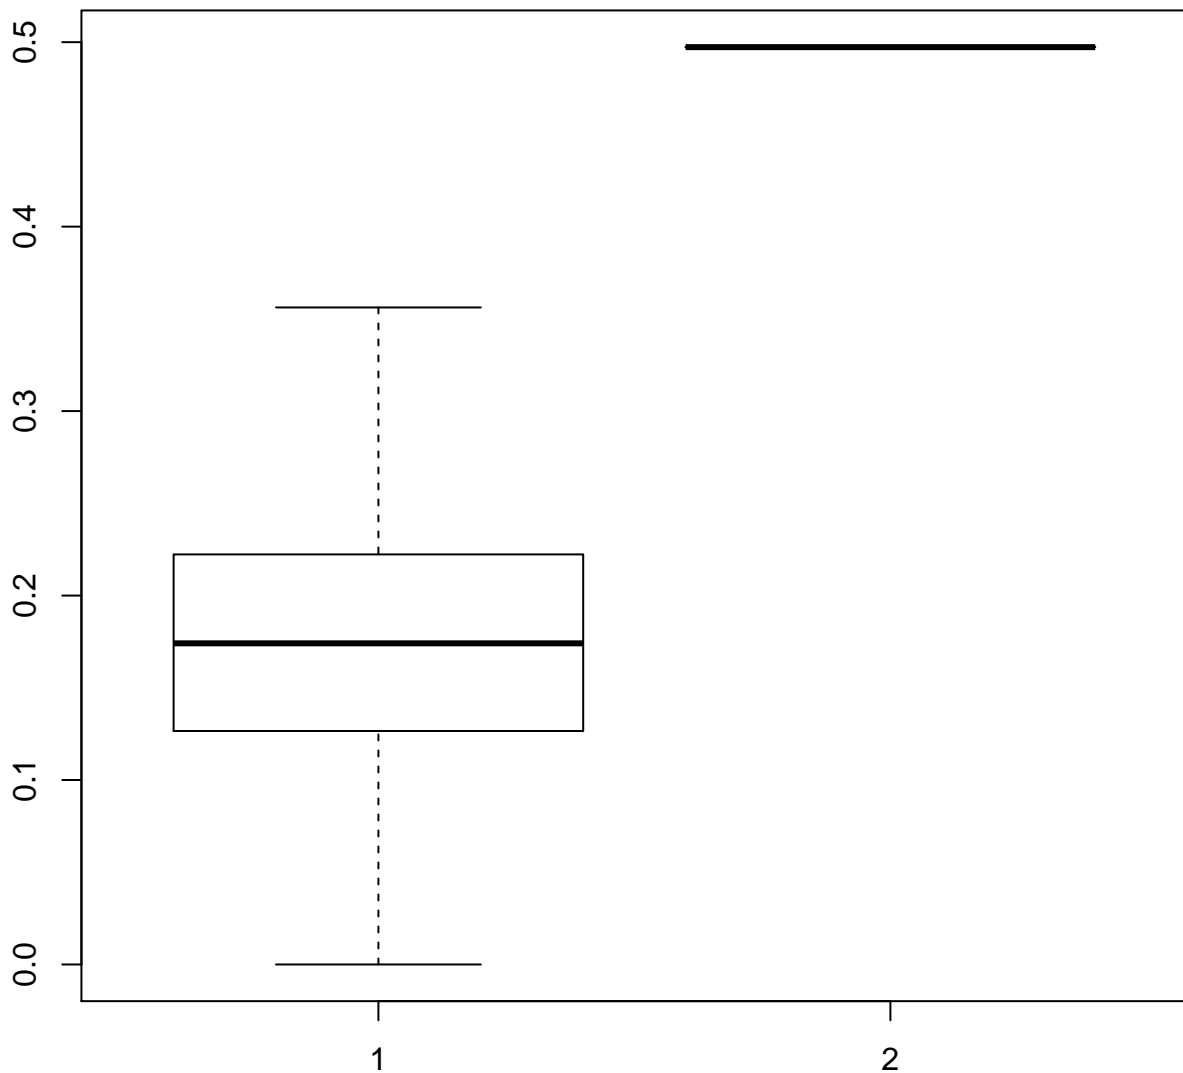

Supplement: SupplementaryMaterialB.zip [file SupplementaryMaterialB.zip]

QQ-plot for all 998,805 p-values

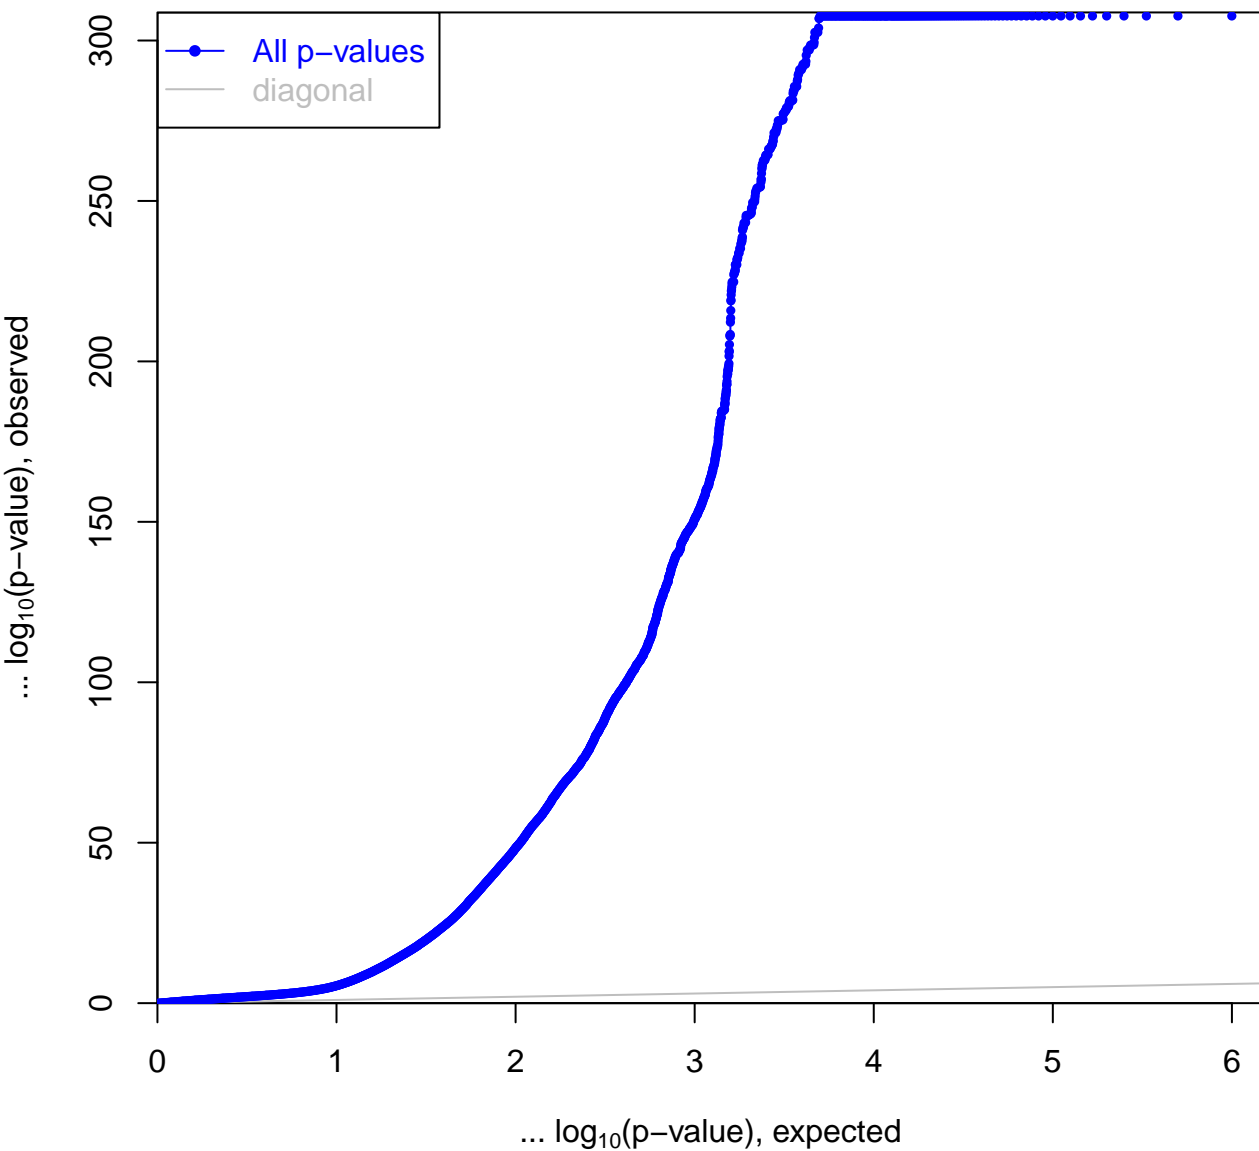

Supplement: SupplementaryMaterialB.zip [file SupplementaryMaterialB.zip]
